# Supplementary material
Source: Springer Nature journal article supplement (https://www.springermedizin.de/resource/supplementary/12889_2011_3964_MOESM5_ESM.pdf/9490992)

Suicide

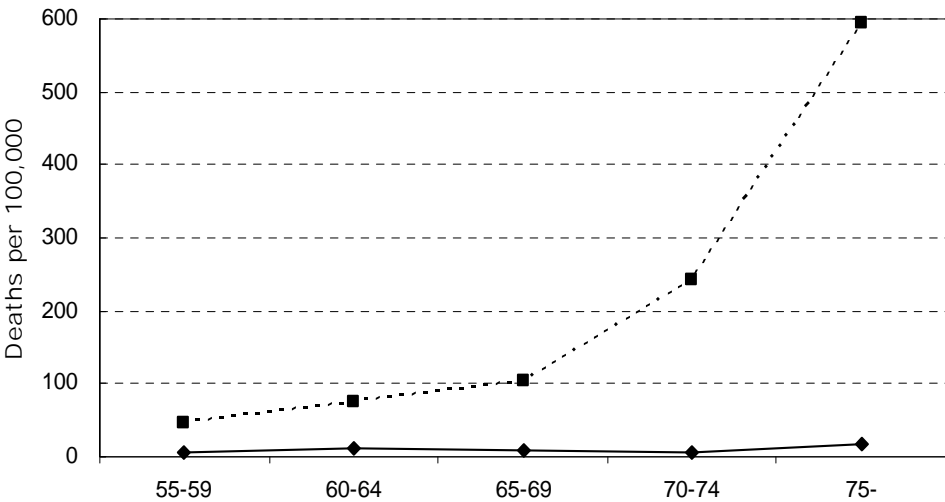

Traffic-related injuries

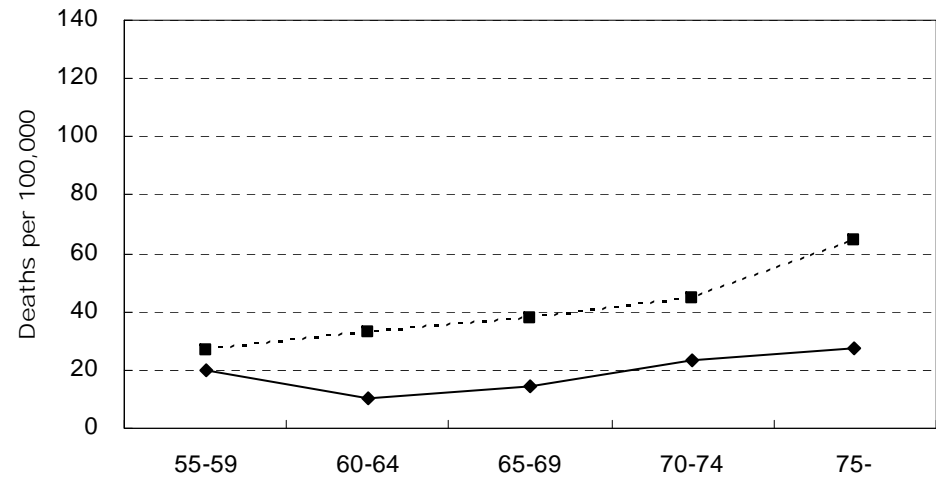

Falls

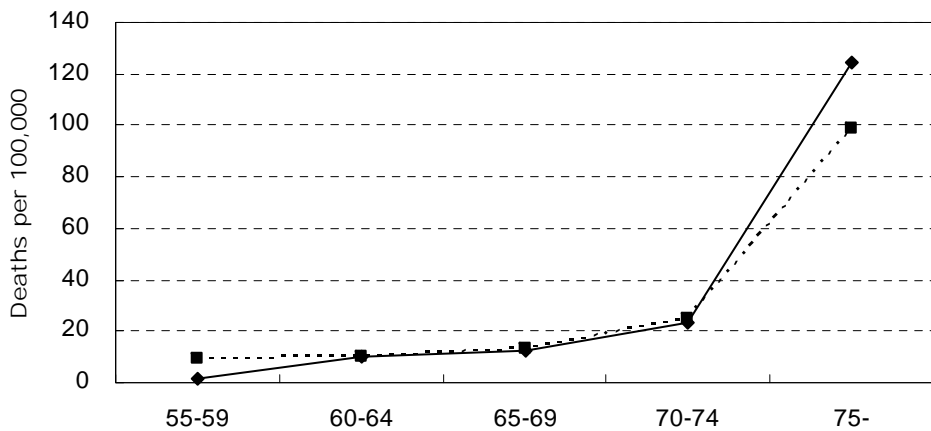

Drownings

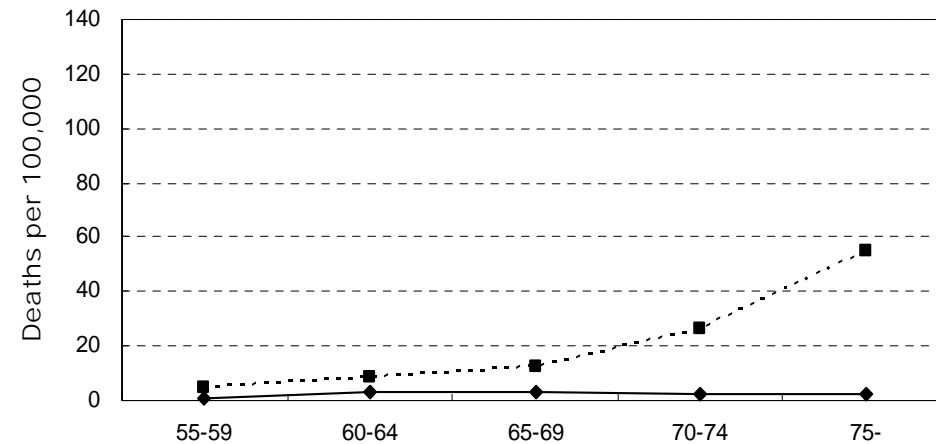

Supplement: MOESM5 [file 9490992]
